# Supplementary material
Source: Elsevier journal article supplement (https://www.sciencedirect.com/science/article/pii/S0025775313002558)
Supplement: mmc1 [file S0025775313002558:mmc1.doc]

Material Suplementario 1. Número y porcentaje de pacientes participantes en el estudio por Comunidad Autónoma y según el ámbito asistencial.

|  | **Fase A** | | | **Fase B** | | |
| --- | --- | --- | --- | --- | --- | --- |
|  | **Atención primaria** | **Consulta especialista** | **Total** | **Atención primaria** | **Consulta especialista** | **Total** |
| Total | 134302 (100,0) | 10009 (100,0) | 144311 (100,0) | 6133 (100,0) | 1238 (100,0) | 7371 (100,0) |
| Andalucía | 22664 (16,9) | 881 (8,8) | 23545 (16,3) | 950 (15,5) | 120 (9,7) | 1070 (14,5) |
| Aragón | 3808 (2,8) | 689 (6,9) | 4497 (3,1) | 151 (2,5) | 46 (3,7) | 197 (2,7) |
| Canarias | 4800 (3,6) | 413 (4,1) | 5213 (3,6) | 214 (3,5) | 53 (4,3) | 267 (3,6) |
| Cantabria | 1289 (1,0) | 14 (0,1) | 1303 (0,9) | 62 (1,0) | 18 (1,5) | 80 (1,1) |
| Castilla y León | 6307 (4,7) | 325 (3,3) | 6632 (4,6) | 282 (4,6) | 59 (4,8) | 341 (4,6) |
| Castilla-La Mancha | 6735 (5,0) | 40 (0,4) | 6775 (4,7) | 316 (5,2) | 28 (2,3) | 344 (4,7) |
| Cataluña | 23474 (17,5) | 2949 (29,5) | 26423 (18,3) | 1134 (18,5) | 288 (23,3) | 1422 (19,3) |
| Ceuta y Melilla | 297 (0,2) | 51 (0,5) | 348 (0,2) | 12 (0,2) | 10 (0,8) | 22 (0,3) |
| Comunidad de Madrid | 15960 (11,9) | 718 (7,2) | 16678 (11, 6) | 608 (9,9) | 99 (8,0) | 707 (9,6) |
| Comunidad Foral de Navarra | 1262 (0,9) | 117 (1,2) | 1379 (1,0) | 55 (0,9) | 47 (3,8) | 102 (1,4) |
| Comunidad Valenciana | 18685 (13,9) | 1102 (11,0) | 19787 (13,7) | 850 (13,9) | 146 (11,8) | 996 (13,5) |
| Extremadura | 3750 (2,8) | 229 (2,3) | 3979 (2,8) | 148 (2,4) | 20 (1,6) | 168 (2,3) |
| Galicia | 9391 (7,0) | 735 (7,3) | 10126 (7,0) | 593 (9,7) | 116 (9,4) | 709 (9,6) |
| Islas Baleares | 3094 (2,3) | 216 (2,2) | 3310 (2,3) | 168 (2,7) | 38 (3,1) | 206 (2,8) |
| La Rioja | 709 (0,5) | 101 (1,0) | 810 (0,6) | 34 (0,6) | 6 (0,5) | 40 (0,5) |
| País Vasco | 5765 (4,3) | 994 (9,9) | 6759 (4,7) | 287 (4,7) | 74 (6,0) | 361 (4,9) |
| Principado de Asturias | 2281 (1,7) | 217 (2,2) | 2498 (1,7) | 114 (1,9) | 40 (3,2) | 154 (2,1) |
| Región de Murcia | 4031 (3,0) | 218 (2,2) | 4249 (2,9) | 155 (2,5) | 30 (2,4) | 185 (2,5) |
